# CORRECTION

## Correction: Endocytosed $\beta$ 2-Microglobulin Amyloid Fibrils Induce Necrosis and Apoptosis of Rabbit Synovial Fibroblasts by Disrupting Endosomal/Lysosomal Membranes: A Novel Mechanism on the Cytotoxicity of Amyloid Fibrils

The *PLOS ONE* Staff

### Notice of Republication

This article was republished on October 9, 2015, to correct an error in the title and citation: “2-Microglobulin” was corrected to “ $\beta$ 2-Microglobulin.” The publisher apologizes for the error. Please download this article again to view the correct version. The originally published, uncorrected article and the republished, corrected article are provided here for reference.

### Supporting Information

**S1 File. Originally published, uncorrected article.**  
(PDF)

**S2 File. Republished, corrected article.**  
(PDF)

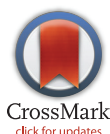

### Reference

1. Okoshi T, Yamaguchi I, Ozawa D, Hasegawa K, Naiki H (2015) Endocytosed  $\beta$ 2-Microglobulin Amyloid Fibrils Induce Necrosis and Apoptosis of Rabbit Synovial Fibroblasts by Disrupting Endosomal/Lysosomal Membranes: A Novel Mechanism on the Cytotoxicity of Amyloid Fibrils. *PLoS ONE* 10(9): e0139330. doi: [10.1371/journal.pone.0139330](https://doi.org/10.1371/journal.pone.0139330) PMID: [26421922](https://pubmed.ncbi.nlm.nih.gov/26421922/)

### OPEN ACCESS

**Citation:** The *PLOS ONE* Staff (2015) Correction: Endocytosed  $\beta$ 2-Microglobulin Amyloid Fibrils Induce Necrosis and Apoptosis of Rabbit Synovial Fibroblasts by Disrupting Endosomal/Lysosomal Membranes: A Novel Mechanism on the Cytotoxicity of Amyloid Fibrils. *PLoS ONE* 10(10): e0141631. doi:10.1371/journal.pone.0141631

**Published:** October 27, 2015

**Copyright:** © 2015 The PLOS ONE Staff. This is an open access article distributed under the terms of the [Creative Commons Attribution License](https://creativecommons.org/licenses/by/4.0/), which permits unrestricted use, distribution, and reproduction in any medium, provided the original author and source are credited.
